# Supplementary material for: Facile synthesis of boronic acid-functionalized magnetic metal–organic frameworks for selective extraction and quantification of catecholamines in rat plasma
Source: Royal Society of Chemistry journal article supplement (doi:10.1039/c8ra07356b), 2018-01-01
Supplement: c8ra07356b1.pdf [file c8ra07356b1.pdf]

**Supporting information:**

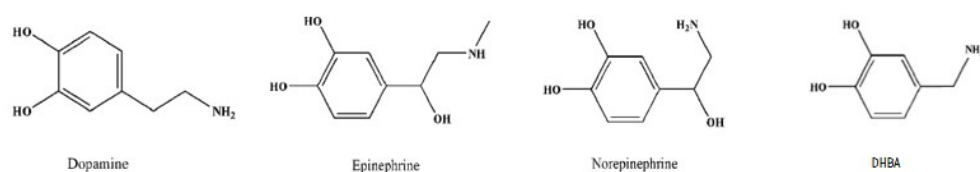

**Fig. S1.** The chemical structures of the dopamine (DA), epinephrine (E), norepinephrine (NE) and 3,4-dihydroxybenzylamine (DHBA)

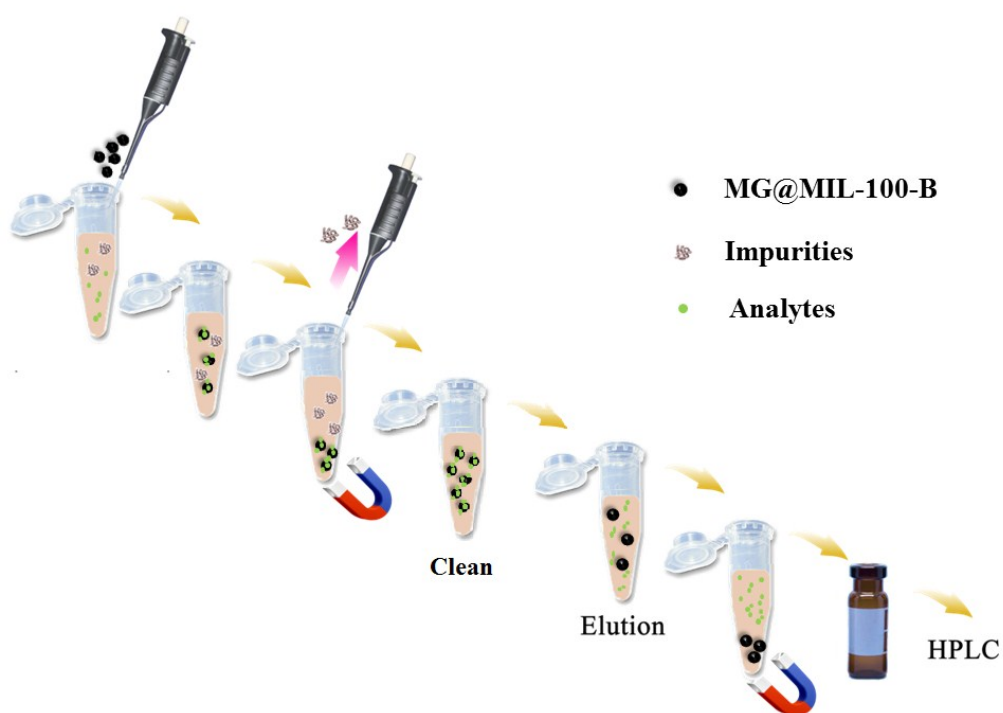

**Fig. S2.** Systematic route of the extraction procedure
